# Supplementary figures and images for: CD73 in small extracellular vesicles derived from HNSCC defines tumour‐associated immunosuppression mediated by macrophages in the microenvironment
Source: PubMed Central journal article supplement — J Extracell Vesicles. 2022 May 6;11(5):e12218. doi: 10.1002/jev2.12218 (PMC9077142; doi:10.1002/jev2.12218), 2022-05-06

Supplementary Figure S3

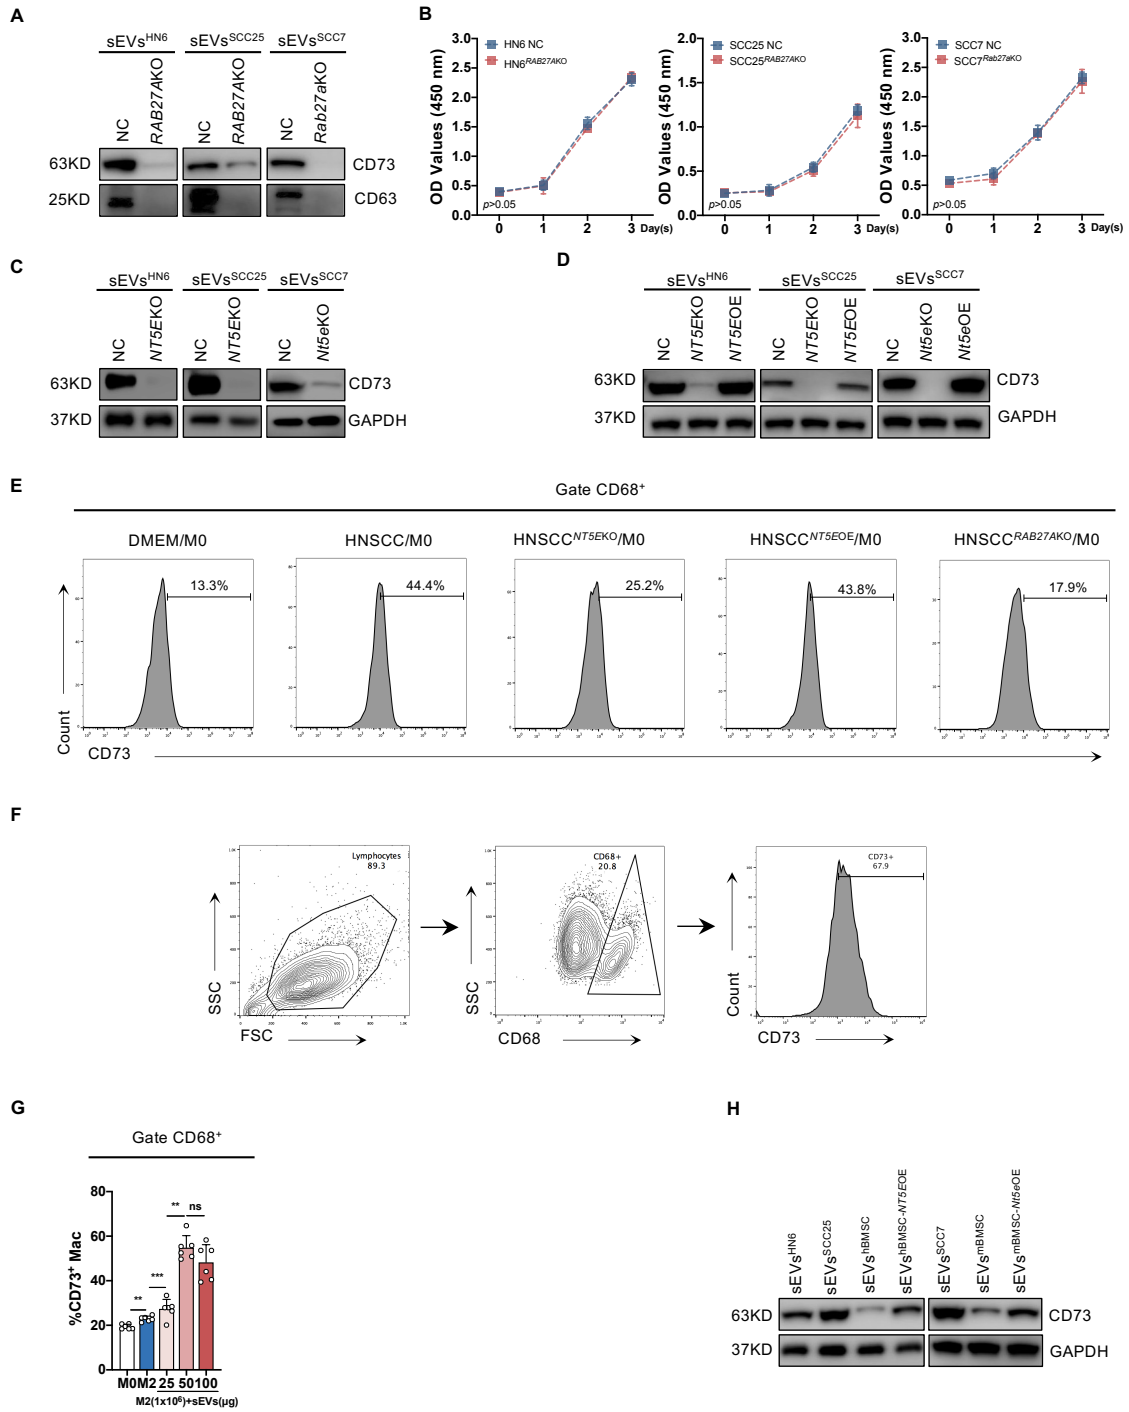

Supplement: JEV2-11-e12218-s005.pdf [file JEV2-11-e12218-s005.pdf]
